# Supplementary material for: Cancer screening risk literacy of physicians in training: An experimental study
Source: PubMed Central journal article supplement (PMC6608976; doi:10.1371/journal.pone.0218821), 2019-07-03
Supplement: pone.0218821.s002.pdf [file pone.0218821.s002.pdf]

**Variable key:**

recommend=recommendation  
screenbe=screening beliefs  
knowlR1=knowledge of screening statistics  
compR1=comprehension  
benefits=perceived benefits  
harms=perceived harms  
numeracy=numeracy  
effective=Screening effectiveness (1=effective, 0=ineffective)  
demand= Demand for screening (1=demand, 0=no demand)  
gender=Gender (1=female, 0=male)  
resident=Resident (1=resident, 0=other)  
stated=Statistical education (1=yes, 0=no)  
Significant effects are marked in red

**\*Indirect effects for screening beliefs**

PROCESS vars =numeracy screenbeliefs compR1 knowlR1 recommendation harms benefits  
effective demand gender resident stated/y= recommendation/x=screenbeliefs /m=  
knowlR1 compR1 benefits harms/model=6/conf=95/boot=5000/contrast=1.

Run MATRIX procedure:

\*\*\*\*\* PROCESS Procedure for SPSS Release 2.11 \*\*\*\*\*

Written by Andrew F. Hayes, Ph.D. www.afhayes.com  
Documentation available in Hayes (2013). www.guilford.com/p/hayes3

\*\*\*\*\*

Model = 6

Y = recommend=recommendation  
X = screenbe=screening beliefs  
M1 = knowlR1=knowledge of screening statistics  
M2 = compR1=comprehension  
M3 = benefits=perceived benefits  
M4 = harms=perceived harms

Statistical Controls:

CONTROL= numeracy effectiv demand gender resident stated

Sample size  
172

\*\*\*\*\*

\*\*\*\*\* DIRECT AND INDIRECT EFFECTS \*\*\*\*\*

Direct effect of X on Y

| Effect | SE    | t      | p     | LLCI   | ULCI  |
|--------|-------|--------|-------|--------|-------|
| .0186  | .0105 | 1.7764 | .0776 | -.0021 | .0393 |

Indirect effect(s) of X on Y

|        | Effect | Boot SE | BootLLCI | BootULCI |
|--------|--------|---------|----------|----------|
| Total: | .0132  | .0110   | -.0072   | .0364    |
| Indl : | .0002  | .0024   | -.0045   | .0054    |

|        |        |       |        |       |
|--------|--------|-------|--------|-------|
| Ind2 : | .0009  | .0007 | .0001  | .0034 |
| Ind3 : | .0023  | .0018 | -.0004 | .0072 |
| Ind4 : | -.0002 | .0004 | -.0016 | .0002 |
| Ind5 : | .0016  | .0010 | .0003  | .0046 |
| Ind6 : | .0001  | .0001 | .0000  | .0005 |
| Ind7 : | .0000  | .0001 | -.0003 | .0000 |
| Ind8 : | .0000  | .0000 | -.0002 | .0000 |
| Ind9 : | .0012  | .0020 | -.0017 | .0066 |
| Ind10: | .0023  | .0034 | -.0038 | .0097 |
| Ind11: | .0001  | .0002 | -.0001 | .0011 |
| Ind12: | .0000  | .0001 | -.0005 | .0000 |
| Ind13: | .0046  | .0090 | -.0124 | .0229 |
| Ind14: | -.0001 | .0003 | -.0013 | .0001 |
| Ind15: | .0004  | .0019 | -.0023 | .0060 |
| (C17)  | -.0008 | .0008 | -.0036 | .0001 |

Indirect effect key

|          |             |             |             |             |
|----------|-------------|-------------|-------------|-------------|
| Ind1 :   | screenbe -> | knowlR1 ->  | recommen    |             |
| Ind2 :   | screenbe -> | knowlR1 ->  | compR1 ->   | recommen    |
| Ind3 :   | screenbe -> | knowlR1 ->  | benefits -> | recommen    |
| Ind4 :   | screenbe -> | knowlR1 ->  | harms ->    | recommen    |
| Ind5 :   | screenbe -> | knowlR1 ->  | compR1 ->   | benefits -> |
| recommen |             |             |             |             |
| Ind6 :   | screenbe -> | knowlR1 ->  | compR1 ->   | harms ->    |
| recommen |             |             |             |             |
| Ind7 :   | screenbe -> | knowlR1 ->  | benefits -> | harms ->    |
| recommen |             |             |             |             |
| Ind8 :   | screenbe -> | knowlR1 ->  | compR1 ->   | benefits -> |
| harms -> | recommen    |             |             |             |
| Ind9 :   | screenbe -> | compR1 ->   | recommen    |             |
| Ind10:   | screenbe -> | compR1 ->   | benefits -> | recommen    |
| Ind11:   | screenbe -> | compR1 ->   | harms ->    | recommen    |
| Ind12:   | screenbe -> | compR1 ->   | benefits -> | harms ->    |
| recommen |             |             |             |             |
| Ind13:   | screenbe -> | benefits -> | recommen    |             |
| Ind14:   | screenbe -> | benefits -> | harms ->    | recommen    |
| Ind15:   | screenbe -> | harms ->    | recommen    |             |

Specific indirect effect contrast definitions

(C17) Ind2 minus Ind5

\*\*\*\*\* ANALYSIS NOTES AND WARNINGS \*\*\*\*\*

Number of bootstrap samples for bias corrected bootstrap confidence intervals:  
5000

Level of confidence for all confidence intervals in output:  
95.00

----- END MATRIX -----

## \*Indirect effects for numeracy

PROCESS vars =numeracy screenbeliefs compR1 knowlR1 recommendation harms benefits  
effective demand gender resident stated/y= recommendation/x=numeracy /m= knowlR1  
compR1 benefits harms/model=6/conf=95/boot=5000/contrast=1.

Run MATRIX procedure:

\*\*\*\*\* PROCESS Procedure for SPSS Release 2.11 \*\*\*\*\*

Written by Andrew F. Hayes, Ph.D. [www.afhayes.com](http://www.afhayes.com)  
Documentation available in Hayes (2013). [www.guilford.com/p/hayes3](http://www.guilford.com/p/hayes3)

\*\*\*\*\*

Model = 6  
Y = recommen  
X = numeracy  
M1 = knowlR1  
M2 = compR1  
M3 = benefits  
M4 = harms

Statistical Controls:

CONTROL= screenbe effectiv demand gender resident stated

Sample size  
172

\*\*\*\*\* DIRECT AND INDIRECT EFFECTS \*\*\*\*\*

Direct effect of X on Y

| Effect | SE    | t       | p     | LLCI   | ULCI  |
|--------|-------|---------|-------|--------|-------|
| -.0821 | .0453 | -1.8144 | .0715 | -.1715 | .0073 |

Indirect effect(s) of X on Y

|        | Effect | Boot SE | BootLLCI | BootULCI |
|--------|--------|---------|----------|----------|
| Total: | -.0300 | .0417   | -.1170   | .0454    |
| Ind1 : | -.0005 | .0069   | -.0195   | .0116    |
| Ind2 : | -.0021 | .0021   | -.0099   | .0001    |
| Ind3 : | -.0057 | .0064   | -.0267   | .0013    |
| Ind4 : | .0005  | .0012   | -.0004   | .0061    |
| Ind5 : | -.0040 | .0038   | -.0157   | .0004    |
| Ind6 : | -.0002 | .0003   | -.0017   | .0000    |
| Ind7 : | .0001  | .0002   | .0000    | .0012    |
| Ind8 : | .0001  | .0001   | .0000    | .0008    |
| Ind9 : | -.0165 | .0127   | -.0553   | -.0006   |
| Ind10: | -.0313 | .0176   | -.0747   | -.0034   |
| Ind11: | -.0013 | .0018   | -.0089   | .0001    |
| Ind12: | .0006  | .0007   | .0000    | .0037    |
| Ind13: | .0170  | .0334   | -.0483   | .0846    |
| Ind14: | -.0003 | .0009   | -.0041   | .0005    |
| Ind15: | .0136  | .0101   | .0001    | .0441    |
| (C85)  | .0147  | .0145   | -.0033   | .0581    |
| (C95)  | -.0449 | .0202   | -.0946   | -.0123   |

Indirect effect key

|          |             |             |             |             |
|----------|-------------|-------------|-------------|-------------|
| Ind1 :   | numeracy -> | knowlR1 ->  | recommen    |             |
| Ind2 :   | numeracy -> | knowlR1 ->  | compR1 ->   | recommen    |
| Ind3 :   | numeracy -> | knowlR1 ->  | benefits -> | recommen    |
| Ind4 :   | numeracy -> | knowlR1 ->  | harms ->    | recommen    |
| Ind5 :   | numeracy -> | knowlR1 ->  | compR1 ->   | benefits -> |
| recommen |             |             |             |             |
| Ind6 :   | numeracy -> | knowlR1 ->  | compR1 ->   | harms ->    |
| recommen |             |             |             |             |
| Ind7 :   | numeracy -> | knowlR1 ->  | benefits -> | harms ->    |
| recommen |             |             |             |             |
| Ind8 :   | numeracy -> | knowlR1 ->  | compR1 ->   | benefits -> |
| harms -> | recommen    |             |             |             |
| Ind9 :   | numeracy -> | compR1 ->   | recommen    |             |
| Ind10:   | numeracy -> | compR1 ->   | benefits -> | recommen    |
| Ind11:   | numeracy -> | compR1 ->   | harms ->    | recommen    |
| Ind12:   | numeracy -> | compR1 ->   | benefits -> | harms ->    |
| recommen |             |             |             |             |
| Ind13:   | numeracy -> | benefits -> | recommen    |             |
| Ind14:   | numeracy -> | benefits -> | harms ->    | recommen    |
| Ind15:   | numeracy -> | harms ->    | recommen    |             |

Specific indirect effect contrast definitions

|       |       |       |       |
|-------|-------|-------|-------|
| (C85) | Ind9  | minus | Ind10 |
| (C95) | Ind10 | minus | Ind15 |

\*\*\*\*\* ANALYSIS NOTES AND WARNINGS \*\*\*\*\*

Number of bootstrap samples for bias corrected bootstrap confidence intervals:  
5000

Level of confidence for all confidence intervals in output:  
95.00

----- END MATRIX -----

## \*Detailed results from the underlying multiple regressions

Outcome: knowlR1

Model Summary

| R     | R-sq  | F      | df1    | df2      | p     |
|-------|-------|--------|--------|----------|-------|
| .2619 | .0686 | 1.7252 | 7.0000 | 164.0000 | .1064 |

Model

|          | coeff  | se    | t       | p     | LLCI   | ULCI   |
|----------|--------|-------|---------|-------|--------|--------|
| constant | 2.3702 | .3821 | 6.2028  | .0000 | 1.6157 | 3.1247 |
| screenbe | -.0262 | .0102 | -2.5666 | .0112 | -.0464 | -.0061 |
| numeracy | .0647  | .0434 | 1.4888  | .1385 | -.0211 | .1504  |
| effectiv | -.0741 | .1293 | -.5732  | .5673 | -.3294 | .1812  |
| demand   | .0555  | .1284 | .4324   | .6660 | -.1979 | .3089  |
| gender   | -.0761 | .1302 | -.5844  | .5597 | -.3332 | .1810  |
| resident | -.0190 | .1454 | -.1306  | .8963 | -.3060 | .2680  |
| statsed  | -.0130 | .1330 | -.0979  | .9221 | -.2755 | .2495  |

\*\*\*\*\*  
Outcome: compR1

Model Summary

| R     | R-sq  | F      | df1    | df2      | p     |
|-------|-------|--------|--------|----------|-------|
| .3389 | .1149 | 2.6439 | 8.0000 | 163.0000 | .0094 |

Model

|          | coeff  | se    | t      | p     | LLCI   | ULCI   |
|----------|--------|-------|--------|-------|--------|--------|
| constant | 1.8601 | .5912 | 3.1466 | .0020 | .6928  | 3.0274 |
| knowlR1  | .2624  | .1087 | 2.4134 | .0169 | .0477  | .4771  |
| screenbe | -.0097 | .0145 | -.6685 | .5048 | -.0384 | .0190  |
| numeracy | .1328  | .0609 | 2.1814 | .0306 | .0126  | .2530  |
| effectiv | .2524  | .1802 | 1.4009 | .1631 | -.1034 | .6082  |
| demand   | -.0135 | .1788 | -.0754 | .9400 | -.3666 | .3396  |
| gender   | .0946  | .1815 | .5212  | .6029 | -.2638 | .4529  |
| resident | -.1518 | .2024 | -.7501 | .4543 | -.5515 | .2478  |
| statsed  | .2439  | .1851 | 1.3177 | .1895 | -.1216 | .6095  |

\*\*\*\*\*  
Outcome: benefits

Model Summary

| R     | R-sq  | F      | df1    | df2      | p     |
|-------|-------|--------|--------|----------|-------|
| .4884 | .2385 | 5.6387 | 9.0000 | 162.0000 | .0000 |

Model

|          | coeff  | se    | t       | p     | LLCI   | ULCI   |
|----------|--------|-------|---------|-------|--------|--------|
| constant | 4.2606 | .7009 | 6.0789  | .0000 | 2.8765 | 5.6446 |
| knowlR1  | -.1809 | .1274 | -1.4199 | .1576 | -.4324 | .0707  |
| compR1   | -.4865 | .0902 | -5.3951 | .0000 | -.6645 | -.3084 |
| screenbe | .0095  | .0167 | .5692   | .5700 | -.0235 | .0426  |
| numeracy | .0352  | .0711 | .4953   | .6210 | -.1052 | .1756  |
| effectiv | .5964  | .2087 | 2.8579  | .0048 | .1843  | 1.0084 |
| demand   | .1243  | .2058 | .6038   | .5468 | -.2822 | .5308  |
| gender   | .4135  | .2091 | 1.9775  | .0497 | .0006  | .8263  |
| resident | -.0639 | .2334 | -.2738  | .7846 | -.5248 | .3970  |

statsed            -.0515            .2142            -.2402            .8105            -.4745            .3716

\*\*\*\*\*

Outcome: harms

Model Summary

|  | R     | R-sq  | F      | df1     | df2      | p     |
|--|-------|-------|--------|---------|----------|-------|
|  | .2969 | .0881 | 1.5561 | 10.0000 | 161.0000 | .1243 |

Model

|          | coeff         | se           | t       | p     | LLCI   | ULCI   |
|----------|---------------|--------------|---------|-------|--------|--------|
| constant | 2.2407        | .8058        | 2.7808  | .0061 | .6494  | 3.8319 |
| knowlR1  | -.0938        | .1330        | -.7056  | .4814 | -.3564 | .1687  |
| compR1   | .1269         | .1016        | 1.2495  | .2133 | -.0737 | .3276  |
| benefits | .1077         | .0815        | 1.3214  | .1883 | -.0533 | .2687  |
| screenbe | -.0048        | .0174        | -.2776  | .7817 | -.0392 | .0295  |
| numeracy | <b>-.1715</b> | <b>.0738</b> | -2.3240 | .0214 | -.3173 | -.0258 |
| effectiv | .1601         | .2219        | .7217   | .4715 | -.2780 | .5983  |
| demand   | .4059         | .2138        | 1.8987  | .0594 | -.0163 | .8281  |
| gender   | -.1735        | .2195        | -.7905  | .4304 | -.6070 | .2600  |
| resident | .2718         | .2422        | 1.1225  | .2633 | -.2064 | .7501  |
| statsed  | .1406         | .2223        | .6323   | .5281 | -.2984 | .5796  |

\*\*\*\*\*

Outcome: recommen

Model Summary

|  | R     | R-sq  | F       | df1     | df2      | p     |
|--|-------|-------|---------|---------|----------|-------|
|  | .7603 | .5780 | 19.9255 | 11.0000 | 160.0000 | .0000 |

Model

|          | coeff         | se           | t       | p     | LLCI   | ULCI   |
|----------|---------------|--------------|---------|-------|--------|--------|
| constant | 2.3832        | .4976        | 4.7898  | .0000 | 1.4006 | 3.3659 |
| knowlR1  | -.0074        | .0803        | -.0924  | .9265 | -.1661 | .1512  |
| compR1   | <b>-.1244</b> | <b>.0616</b> | -2.0205 | .0450 | -.2460 | -.0028 |
| benefits | <b>.4839</b>  | <b>.0494</b> | 9.7889  | .0000 | .3862  | .5815  |
| harms    | -.0794        | .0475        | -1.6706 | .0967 | -.1733 | .0145  |
| screenbe | .0186         | .0105        | 1.7764  | .0776 | -.0021 | .0393  |
| numeracy | -.0821        | .0453        | -1.8144 | .0715 | -.1715 | .0073  |
| effectiv | -.0165        | .1340        | -.1230  | .9023 | -.2812 | .2482  |
| demand   | .0623         | .1304        | .4780   | .6333 | -.1952 | .3198  |
| gender   | <b>.3842</b>  | <b>.1327</b> | 2.8961  | .0043 | .1222  | .6462  |
| resident | .2318         | .1467        | 1.5805  | .1160 | -.0578 | .5214  |
| statsed  | <b>-.3033</b> | <b>.1343</b> | -2.2591 | .0252 | -.5684 | -.0382 |
